# Supplementary material for: Thiol-functionalized silica microspheres for online preconcentration and determination of mercury species in seawater by high performance liquid chromatography and inductively coupled plasma mass spectrometry
Source: Royal Society of Chemistry journal article supplement (doi:10.1039/c4ra13941k), 2015-01-01
Supplement: c4ra13941k1.pdf [file c4ra13941k1.pdf]

### Electronic Supplementary Information

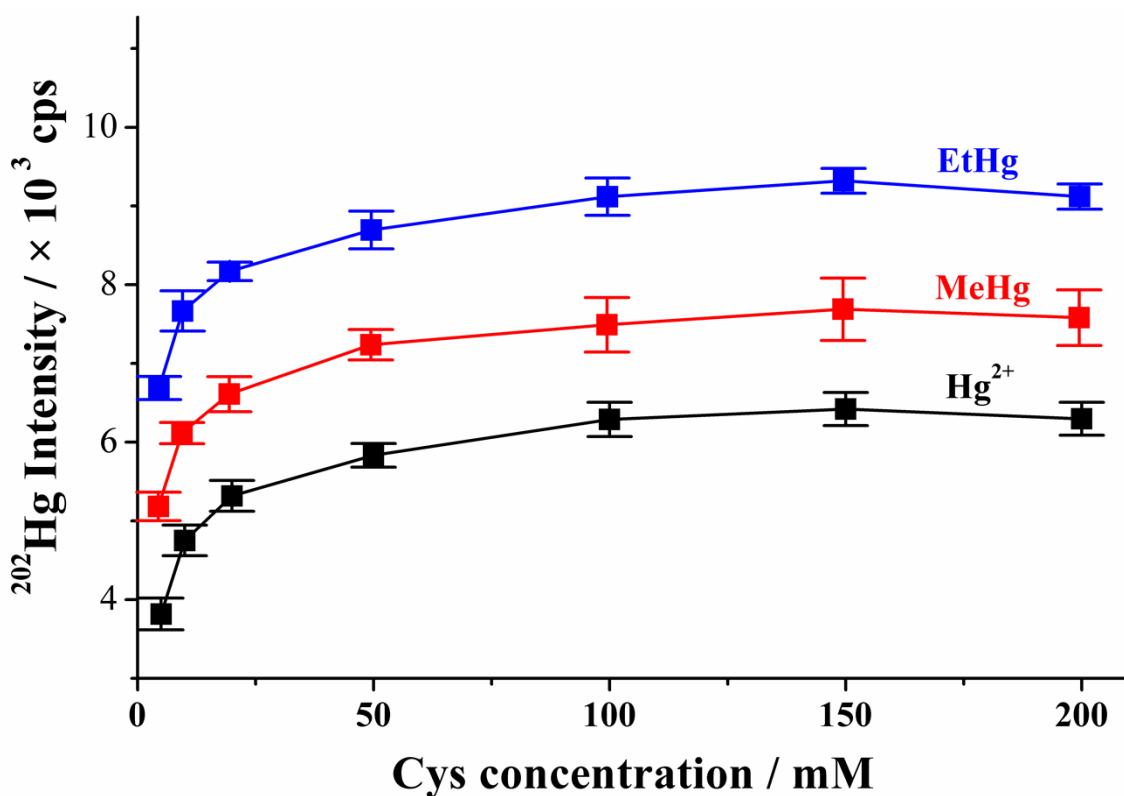

Fig. S1 The effect of L-cysteine concentration on the elution.

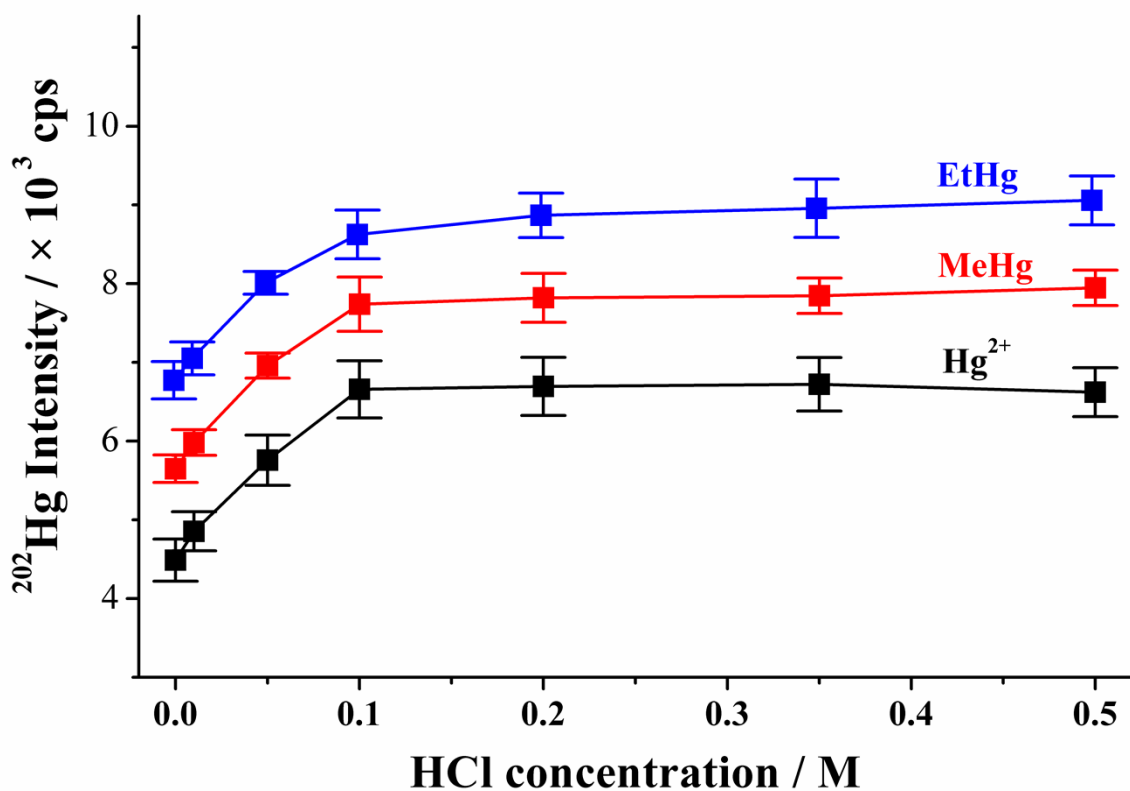

Fig. S2 The effect of HCl concentration on the elution.

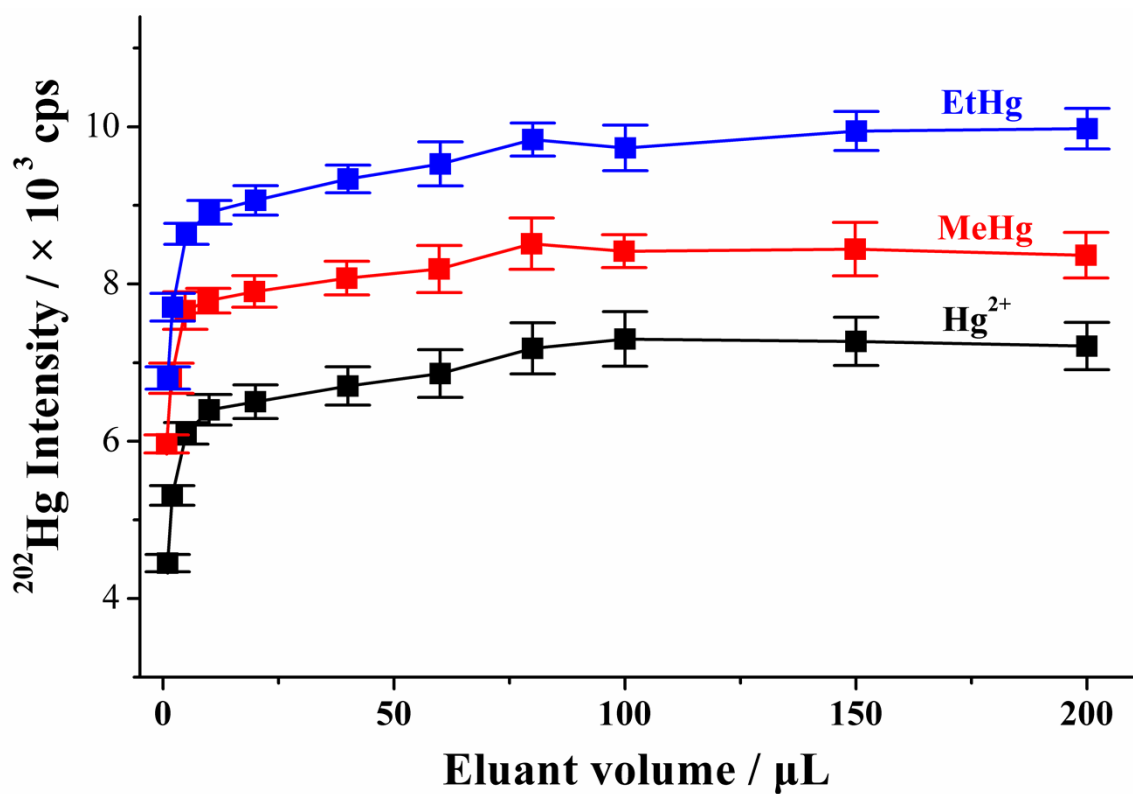

Fig. S3 The effect of the volume of the eluant on the elution.

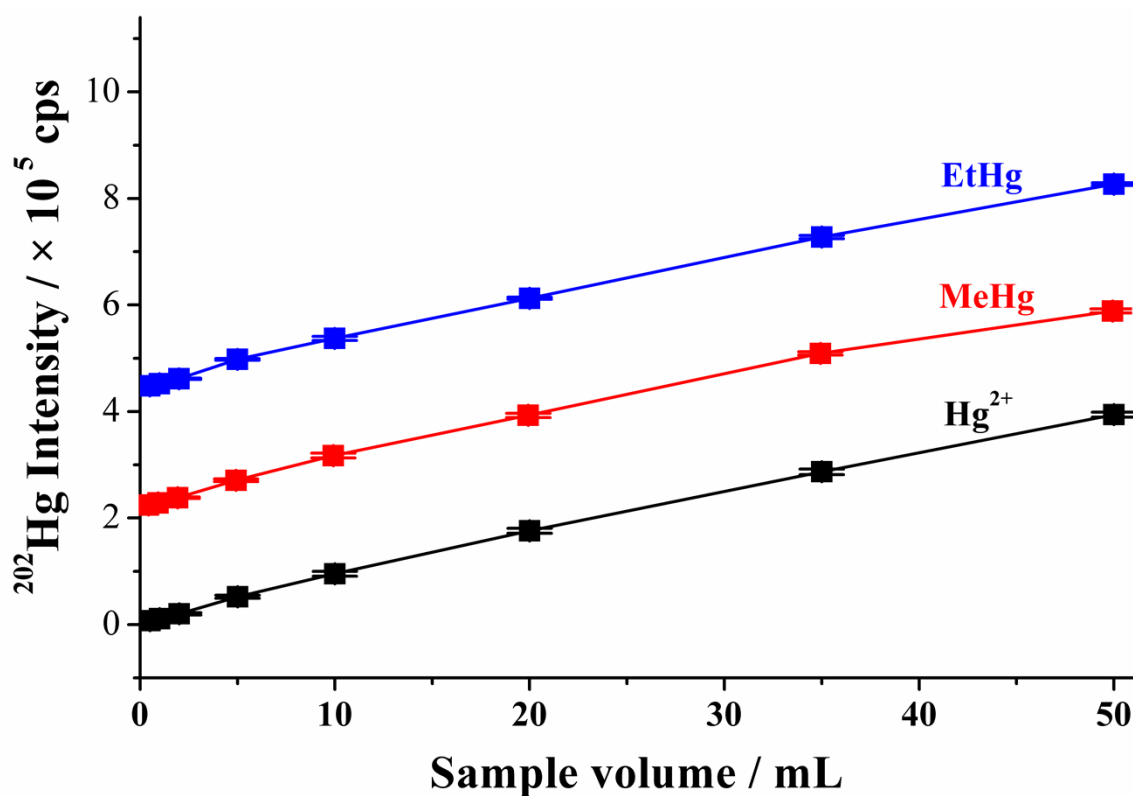

Fig. S4 The effect of sample volume on the preconcentration.

Table S1 Comparison with other preconcentration methods in terms of analytical time, LOD, EF, sample consumption and preconcentration time.

| Analytical method with enrichment | Enriching material                                                                                            | Adsorption capacity (mg g <sup>-1</sup> )           | Enrichment factor <sup>a</sup>                   | Retention time (min)                              | Detection limit (µg L <sup>-1</sup> )                            | Sample volume (mL) | Enriching time (min) | Ref.      |
|-----------------------------------|---------------------------------------------------------------------------------------------------------------|-----------------------------------------------------|--------------------------------------------------|---------------------------------------------------|------------------------------------------------------------------|--------------------|----------------------|-----------|
| HPLC-ICP-MS with SPE              | Thiol-functionalized silica microspheres                                                                      | Hg <sup>2+</sup> : 27.4<br>MeHg: 62.1<br>EtHg: 59.6 | Hg <sup>2+</sup> : 830<br>MeHg: 916<br>EtHg: 883 | Hg <sup>2+</sup> : 1.9<br>MeHg: 3.2<br>EtHg: 7.4  | Hg <sup>2+</sup> : 0.000019<br>MeHg: 0.000013<br>EtHg: 0.0000014 | 5                  | 0.6                  | This work |
| AFS with SPE                      | Thiol-rich polyhedral oligomeric silsesquioxane                                                               | MeHg: 46.7<br>Hg <sup>2+</sup> : 12.9               | MeHg: 9.3<br>Hg <sup>2+</sup> : 8.9              | -                                                 | MeHg: 0.004<br>Hg <sup>2+</sup> : 0.002                          | 4                  | 43                   | 1         |
| CVAAS with SPE                    | 2-(3-(2-Aminoethylthio)-propylthio)-ethanamine modified silica                                                | -                                                   | 50                                               | -                                                 | Hg <sup>2+</sup> : 0.035                                         | 10                 | >1.8                 | 2         |
| CE-UV with SPE                    | 3-Mercaptopropyltrimethoxysilane                                                                              | -                                                   | 10                                               | MeHg: 9.1<br>PhHg: 9.6<br>Hg <sup>2+</sup> : 14.6 | MeHg: 11.9<br>PhHg: 7.4<br>Hg <sup>2+</sup> : 3.4                | 1                  | >4.3                 | 3         |
| AAS with SPE                      | Thiol-functionalized metal-organic framework nanocomposite                                                    | Hg <sup>2+</sup> : 210                              | Hg <sup>2+</sup> : 167                           | -                                                 | Hg <sup>2+</sup> : 0.02                                          | 500                | >3                   | 4         |
| CVAAS with SPE                    | Ethylene glycol bis-mercaptoacetate modified 3-(trimethoxysilyl)-1-propanethiol coated magnetic nanoparticles | Hg <sup>2+</sup> : 41.6                             | Hg <sup>2+</sup> : 291                           | -                                                 | Hg <sup>2+</sup> : 0.01                                          | -                  | -                    | 5         |
| CVAAS with SPE                    | Thiodiethanethiol modified silica coated magnetic nanoparticles                                               | Hg <sup>2+</sup> : 68.1                             | Hg <sup>2+</sup> : 285                           | -                                                 | Hg <sup>2+</sup> : 0.004                                         | 300                | 30                   | 6         |
| CVAAS with SPE                    | 2-(2'-Benzothiazolylazo)-p-cresol functionalized polystyrene-divinylbenzene resin                             | -                                                   | Hg <sup>2+</sup> : 46                            | -                                                 | Hg <sup>2+</sup> : 0.011                                         | 100                | 18.6                 | 7         |
| CVAAS with SPE                    | Oxidized carbon nanotubes                                                                                     | Hg <sup>2+</sup> : 3.2                              | Hg <sup>2+</sup> : 150                           | -                                                 | Hg <sup>2+</sup> : 0.002                                         | 200                | >3                   | 8         |
| AFS with SPE                      | Silver modified magnetic carbon nanotubes                                                                     | -                                                   | Hg <sup>2+</sup> : 125                           | -                                                 | Hg <sup>2+</sup> : 0.03                                          | 500                | >20                  | 9         |
| AFS with SPE                      | Silver and gold nanoparticle membrane filters                                                                 | -                                                   | -                                                | -                                                 | Hg <sup>2+</sup> : 0.004                                         | 100                | -                    | 10        |
| AFS with SPE                      | Magnetic gold nanoparticle microspheres                                                                       | Hg <sup>2+</sup> : 2.6                              | Hg <sup>2+</sup> : 30                            | -                                                 | Hg <sup>2+</sup> : 0.0015                                        | 200                | >18                  | 11        |
| ICP-OES with SPE                  | N-(pyridin-2-ylmethyl)ethanamine coated magnetic nanoparticles                                                | Hg <sup>2+</sup> : 147                              | -                                                | -                                                 | Hg <sup>2+</sup> : 0.03                                          | 500                | >17                  | 12        |
| CVAAS                             | Tetradecyl(trihexyl)phosphoniumchloride immobilized polystyrene-divinylbenzene resin                          | -                                                   | Hg <sup>2+</sup> : 51                            | -                                                 | Hg <sup>2+</sup> : 0.0023                                        | 40                 | 5.5                  | 13        |

|                                                       |                                                                          |                         |                                                                               |                                                                           |                                                                                              |      |      |    |
|-------------------------------------------------------|--------------------------------------------------------------------------|-------------------------|-------------------------------------------------------------------------------|---------------------------------------------------------------------------|----------------------------------------------------------------------------------------------|------|------|----|
| CVAAS                                                 | 1,3-Bis(2-ethoxyphenyl)triazene modified octadecyl silica membrane disks | Hg <sup>2+</sup> : 98.9 | Hg <sup>2+</sup> : 380                                                        | -                                                                         | Hg <sup>2+</sup> : 0.011                                                                     | 1000 | 21.7 | 14 |
| HPLC-ICP-MS with SPE                                  | Anion exchange column                                                    | -                       | Hg <sup>+</sup> : 1025<br>MeHg: 1084<br>EtHg: 1108<br>Hg <sup>2+</sup> : 1046 | Hg <sup>+</sup> : 0.7<br>MeHg: 1.1<br>EtHg: 2.2<br>Hg <sup>2+</sup> : 3.9 | Hg <sup>+</sup> : 0.000015<br>MeHg: 0.00001<br>EtHg: 0.000009<br>Hg <sup>2+</sup> : 0.000016 | 6    | 1.5  | 15 |
| HPLC-ICP-MS with flow injection displacement sorption | FIDS with Cellulose acetate fiber                                        | -                       | 80                                                                            | MeHg: 8.6<br>EtHg: 11.6<br>PhHg: 13.0<br>Hg <sup>2+</sup> : 16.9          | 1-2.5                                                                                        | 4    | 1    | 16 |
| HPLC-ICP-MS with CPE                                  | Triton X-114                                                             | -                       | MeHg: 18<br>PhHg: 46<br>Hg <sup>2+</sup> : 57                                 | MeHg: 6.2<br>EtHg: 7.7<br>PhHg: 9.2<br>Hg <sup>2+</sup> : 13.8            | MeHg: 0.01<br>PhHg: 0.008<br>Hg <sup>2+</sup> : 0.006                                        | 25   | >20  | 17 |
| HPLC-ICP-MS with CPE                                  | Triton X-114                                                             | -                       | MeHg: 21<br>Hg <sup>2+</sup> : 42                                             | MeHg: 4.2<br>Hg <sup>2+</sup> : 5.1                                       | MeHg: 0.01<br>Hg <sup>2+</sup> : 0.004                                                       | 25   | >20  | 18 |
| HPLC-UV with LLME                                     | 1-Hexyl-3-methylimidazolium hexafluorophosphate                          | -                       | MeHg: 114<br>PhHg: 106<br>Hg <sup>2+</sup> : 107                              | MeHg: 9.7<br>PhHg: 13.2<br>Hg <sup>2+</sup> : 19.6                        | MeHg: 1.0<br>PhHg: 1.9<br>Hg <sup>2+</sup> : 0.3                                             | 5    | >9   | 19 |
| HPLC-ICP-MS with LLME                                 | Carbon tetrachloride                                                     | -                       | MeHg: 138<br>Hg <sup>2+</sup> : 350                                           | MeHg: 10.6<br>Hg <sup>2+</sup> : 12.4                                     | MeHg: 0.008<br>Hg <sup>2+</sup> : 0.001                                                      | 5    | >15  | 20 |
| HPLC-ICP-MS with LLME                                 | Methylimidazolium hexafluorophosphate                                    | -                       | Hg <sup>2+</sup> : 760<br>MeHg: 115<br>EtHg: 235                              | Hg <sup>2+</sup> : 2.0<br>MeHg: 2.8<br>EtHg: 5.6                          | Hg <sup>2+</sup> : 0.001<br>MeHg: 0.007<br>EtHg: 0.005                                       | 5    | >10  | 21 |
| CVAAS with LLME                                       | Methyltrioctylammonium thiosalicylate                                    | -                       | MeHg: 200<br>Hg <sup>2+</sup> : 310                                           | -                                                                         | MeHg: 0.4<br>Hg <sup>2+</sup> : 0.03                                                         | 10   | >22  | 22 |
| HPLC-ICP-MS with SPE                                  | Cubical foam immobilized with sodium diethyldithiocarbamate              | -                       | 100                                                                           | Hg <sup>2+</sup> : 2.4<br>MeHg: 2.8<br>EtHg: 4.0<br>PhHg: 9.0             | Hg <sup>2+</sup> : 0.005<br>MeHg: 0.005<br>EtHg: 0.008<br>PhHg: 0.01                         | 500  | 250  | 23 |

|                      |                                                                |   |                                                          |                                                                  |                                                               |         |          |               |
|----------------------|----------------------------------------------------------------|---|----------------------------------------------------------|------------------------------------------------------------------|---------------------------------------------------------------|---------|----------|---------------|
| HPLC-UV with SPE     | C <sub>18</sub>                                                | - | 200                                                      | MeHg: 5.9<br>PhHg: 7.0<br>Hg <sup>2+</sup> : 9.0                 | MeHg: 29<br>PhHg: 33<br>Hg <sup>2+</sup> : 27                 | 50-500  | 12.5-125 | <sup>24</sup> |
| HPLC-ICP-MS with SPE | C <sub>18</sub>                                                | - | MeHg: 6<br>Hg <sup>2+</sup> : 10                         | MeHg: 2.4<br>Hg <sup>2+</sup> : 1.9                              | MeHg: 0.00002<br>Hg <sup>2+</sup> : 0.00007                   | 20      | Unknown  | <sup>25</sup> |
| HPLC-AFS with SPE    | C <sub>18</sub>                                                | - | 1000                                                     | MeHg: 9.4<br>EtHg: 13.6<br>Hg <sup>2+</sup> : 18.4<br>PhHg: 25.4 | MeHg: 4.3<br>EtHg: 1.4<br>Hg <sup>2+</sup> : 0.8<br>PhHg: 0.8 | 100-500 | 20-100   | <sup>26</sup> |
| HPLC-UV with SPE     | C <sub>18</sub> modified with 1,3-bis(2-cyanobenzene) triazene | - | 100                                                      | Hg <sup>2+</sup> : 8.6<br>MeHg: 9.6<br>PhHg: 10.4                | Hg <sup>2+</sup> : 1.3<br>MeHg: 1.0<br>PhHg: 0.8              | 250     | 12.5     | <sup>27</sup> |
| HPLC-UV with SPE     | C <sub>18</sub>                                                | - | 100                                                      | MeHg: 5.4<br>PhHg: 6.5<br>Hg <sup>2+</sup> : 8.5                 | MeHg: 0.06<br>PhHg: 0.08<br>Hg <sup>2+</sup> : 0.07           | 10-250  | 1-25     | <sup>28</sup> |
| HPLC-ICP-MS with SPE | C <sub>18</sub>                                                | - | MeHg: 31.2<br>Hg <sup>2+</sup> : 27.8<br>EtHg: 23.9      | MeHg: 2.5<br>Hg <sup>2+</sup> : 5.7<br>EtHg: 9.8                 | MeHg: 0.003<br>Hg <sup>2+</sup> : 0.003<br>EtHg: 0.003        | 100     | 50       | <sup>29</sup> |
| IC-CVAAS with SPE    | C <sub>18</sub> and cation exchange column                     | - | MeHg: 200-300<br>EtHg: 200-300<br>Hg <sup>2+</sup> : 700 | MeHg: 2.5<br>EtHg: 3.6<br>Hg <sup>2+</sup> : 6.8                 | MeHg: 50<br>EtHg: 20<br>Hg <sup>2+</sup> : 10                 | 10-100  | 2.5-25   | <sup>30</sup> |
| HPLC-ICP-MS with SPE | Cation exchange column                                         | - | 1250                                                     | Hg <sup>2+</sup> : 0.7<br>MeHg: 1.0<br>EtHg: 2.1                 | Hg <sup>2+</sup> : 0.00004<br>MeHg: 0.00002<br>EtHg: 0.000008 | 30      | 3.5      | <sup>31</sup> |

**Abbreviations: clond point extraction (CPE); liquid-liquid microextraction (LLME); solid phase extraction (SPE); monomethylmercury (MeHg); ethylmercury (EtHg); phenylmercury (PhHg); inductively coupled plasma mass spectrometry (ICP-MS); high performance liquid chromatography (HPLC); Ion exchange chromatography (IC); capillary electrophoresis (CE); ultra-violet detection (UV); cold vapor atomic absorption spectrometry (CVAAS); atomic fluorescence absorption (AFS); inductively coupled plasma optical emission spectrometry (ICP-OES).**

**Reference:**

1. W. Wang, M. Chen, X. Chen and J. Wang, *Chem Eng J*, 2014, **242**, 62-68.
2. M. Puanngam, P. K. Dasgupta and F. Unob, *Talanta*, 2012, **99**, 1040-1045.
3. X. H. Bai and Z. F. Fan, *Microchim Acta*, 2010, **170**, 107-112.
4. M. Sohrabi, *Microchim Acta*, 2014, **181**, 435-444.
5. M. H. Mashhadizadeh, M. Amoli-Diva, M. R. Shapouri and H. Afruzi, *Food Chem*, 2014, **151**, 300-305.
6. A. Beiraghi, K. Pourghazi and M. Amoli-Diva, *Anal Lett*, 2014, **47**, 1210-1223.
7. V. A. Lemos and L. O. dos Santos, *Food Chem*, 2014, **149**, 203-207.
8. B. Parodi, A. Londonio, G. Polla, M. Savio and P. Smichowski, *J Anal At Spectrom*, 2014, **29**, 880-885.
9. C.-G. Yuan, J. Wang, W. Zhai, Y. Zhang, Y. Zhang, J. Li and Q. Zhang, *Int J Environ Anal Chem*, 2013, **93**, 1513-1524.
10. N. Panichev, M. M. Kalumba and K. L. Mandiwana, *Anal Chim Acta*, 2014, **813**, 56-62.
11. W.-b. Zhang, C.-x. Sun and X.-a. Yang, *Anal Methods*, 2014, **6**, 2876-2882.
12. E. Najafi, F. Aboufazeli, H. R. Lotfi Zadeh Zhad, O. Sadeghi and V. Amani, *Food Chem*, 2013, **141**, 4040-4045.
13. L. B. Escudero, R. A. Olsina and R. G. Wuilloud, *Talanta*, 2013, **116**, 133-140.
14. M. K. Rofouei, A. Sabouri, A. Ahmadalinezhad and H. Ferdowsi, *J Hazard Mater*, 2011, **192**, 1358-1363.
15. H. Cheng, C. Wu, L. Shen, J. Liu and Z. Xu, *Anal Chim Acta*, 2014, **828**, 9-16.
16. L. M. Dong, X. P. Yan, Y. Li, Y. Jiang, S. W. Wang and D. Q. Jiang, *J Chromatogr A*, 2004, **1036**, 119-125.
17. J. G. Chen, H. W. Chen, X. Z. Jin and H. T. Chen, *Talanta*, 2009, **77**, 1381-1387.
18. H. T. Chen, J. G. Chen, X. Z. Jin and D. Y. Wei, *J Hazard Mater*, 2009, **172**, 1282-1287.
19. Z. B. Gao and X. G. Ma, *Anal Chim Acta*, 2011, **702**, 50-55.
20. X. Y. Jia, Y. Han, X. L. Liu, T. C. Duan and H. T. Chen, *Spectrochim Acta Part B*, 2011, **66**, 88-92.
21. X. Y. Jia, Y. Han, C. Wei, T. C. Duan and H. T. Chen, *J Anal At Spectrom*, 2011, **26**, 1380-1386.
22. E. Stanisiz, J. Werner and H. Matusiewicz, *Microchem J*, 2013, **110**, 28-35.
23. J. S. dos Santos, M. de la Guárdia, A. Pastor and M. L. P. dos Santos, *Talanta*, 2009, **80**, 207-211.
24. D. M. Sánchez, R. Martín, R. Morante, J. Marín and M. L. Munuera, *Talanta*, 2000, **52**, 671-679.
25. W. R. L. Cairns, M. Rinaldo, R. Hennebelle, C. Turetta, G. Capodaglio, C. F. Ferrari, A. Dommergue, P. Cescon and C. Barbante, *Anal Chim Acta*, 2008, **622**, 62-69.
26. J. Margetinová, P. Houserová-Pelcová and V. Kubáň, *Anal Chim Acta*, 2008, **615**, 115-123.
27. T. Hashempur, M. K. Rofouei and A. R. Khorrami, *Microchem J*, 2008, **89**, 131-136.
28. H. Hashemi-Moghaddam and M. Saber-Tehrani, *JAOC Int*, 2008, **91**, 1453-1458.
29. Y. G. Yin, M. Chen, J. F. Peng, J. F. Liu and G. B. Jiang, *Talanta*, 2010, **81**, 1788-1792.
30. C. Sarzanini, G. Sacchero, M. Aceto, O. Abollino and E. Mentasti, *Anal Chim Acta*, 1994, **284**, 661-667.
31. X. Y. Jia, D. R. Gong, Y. Han, C. Wei, T. C. Duan and H. T. Chen, *Talanta*, 2012, **88**, 724-729.
